# Supplementary material for: Detecting Variants in the NBN Gene While Testing for Hereditary Breast Cancer: What to Do Next?
Source: MDPI journal article supplement (doi:10.3390/ijms22115832), 2021-05-29
Supplement: s1 [file s1]

| Name Primer | Exon | Position on hg38 |          |
|-------------|------|------------------|----------|
|             |      | start            | end      |
| NBS1-1F     | 1    | 89984756         | 89984737 |
| NBS1-1R     |      | 89984386         | 89984367 |
| NBS1-2F     | 2    | 89983082         | 89983063 |
| NBS1-2R     |      | 89982630         | 89982607 |
| NBS1-3F     | 3    | 89981631         | 89981616 |
| NBS1-3R     |      | 89981236         | 89981217 |
| NBS1-4F     | 4    | 89981017         | 89980998 |
| NBS1-4R     |      | 89980683         | 89980664 |
| NBS1-5F     | 5    | 89978421         | 89978400 |
| NBS1-5R     |      | 89978152         | 89978132 |
| NBS1-6F     | 6    | 89971462         | 89971442 |
| NBS1-6R     |      | 89971010         | 89970990 |
| NBS1-7F     | 7    | 89970664         | 89970642 |
| NBS1-7R     |      | 89970299         | 89970275 |
| NBS1-8F     | 8    | 89964588         | 89964572 |
| NBS1-8R     |      | 89964320         | 89964302 |
| NBS1-9F     | 9    | 89958964         | 89958946 |
| NBS1-9R     |      | 89958611         | 89958593 |
| NBS1-10F    | 10   | 89955718         | 89955699 |
| NBS1-10R    |      | 89955186         | 89955168 |
| NBS1-11F    | 11   | 89953771         | 89953748 |
| NBS1-11R    |      | 89953198         | 89953174 |
| NBS1-12F    | 12   | 89947977         | 89947955 |
| NBS1-12R    |      | 89947765         | 89947739 |
| NBS1-13F    | 13   | 89946370         | 89946350 |
| NBS1-13R    |      | 89946080         | 89946057 |
| NBS1-14F    | 14   | 89943473         | 89943452 |
| NBS1-14R    |      | 89943101         | 89943076 |
| NBS1-15F    | 15   | 89937194         | 89937175 |
| NBS1-15R    |      | 89936920         | 89936900 |
| NBS1-16F    | 16   | 89935717         | 89935699 |
| NBS1-16R    |      | 89935140         | 89935119 |

| Name Primer   | Exon  | Sequence 5'→3'          |
|---------------|-------|-------------------------|
| NBS1-1F_cDNA  | 1-2   | accgatgtggaaactgctg     |
| NBS1-2R_cDNA  |       | caacgccagtcaaaagtctg    |
| NBS1-10F_cDNA | 10-11 | tttcaccaactaaattgccaaag |
| NBS1-11R_cDNA |       | tttctcatccctttcccttt    |
