# Supplementary material for: Detecting Variants in the NBN Gene While Testing for Hereditary Breast Cancer: What to Do Next?
Source: MDPI journal article supplement (doi:10.3390/ijms22115832), 2021-05-29
Supplement: s1 [file s1]

Supplementary Table 1

SNP detected in the patients under study: the frequency in our sample was compared to the public population databases of Exome Aggregation Consortium (ExAC) and 1000genomes

| SNP<br>(rs dbSNP)            | Chromosome<br>position<br>(GRCh38.p12) | Protein<br>change | Position  | Heterozigote<br>N° | Homozigote<br>N° | MAF in our<br>cases | MAF in<br>European<br>population <sup>1</sup> | p-value <sup>3</sup> | MAF in<br>European<br>population <sup>2</sup> | p-value <sup>3</sup> |
|------------------------------|----------------------------------------|-------------------|-----------|--------------------|------------------|---------------------|-----------------------------------------------|----------------------|-----------------------------------------------|----------------------|
| c.102G/A<br>(rs1063045)      | 8:89982791                             | p.Leu34Leu        | Exon 2    | 40                 | 8                | 0.2414              | 0.3283                                        | 0.0060               | 0.3062                                        | 0.0611               |
| c.480+24T/C<br>(rs1805842)   | 8:89980710                             | -                 | Intron 4  | 1                  | 0                | 0.0043              | 0                                             | <0.0001              | 0                                             | 0.4229               |
| c.553G/C<br>(rs1805794)      | 8:89978251                             | p.Glu185Gln       | Exon 5    | 34                 | 9                | 0.2241              | 0.3275                                        | 0.0010               | 0.3062                                        | 0.0164               |
| c.702+16G/A<br>(rs2272581)   | 8:89971157                             | -                 | Intron 6  | 0                  | 1                | 0.0086              | 1.584 <sup>-05</sup>                          | 0.0001               | 0                                             | 0.0413               |
| c.702+149T/C<br>(rs3026271)  | 8:89971024                             | -                 | Intron 6  | 11                 | 0                | 0.0474              | /                                             | /                    | 0.0765                                        | 0.1572               |
| c.703-18G/A<br>(rs769418)    | 8:89970575                             | -                 | Intron 6  | 2                  | 0                | 0.0086              | 0.03082                                       | 0.0776               | 0.0278                                        | 0.1392               |
| c.896+27A/C<br>(rs114182293) | 8:89970337                             | -                 | Intron 7  | 1                  | 0                | 0.0043              | 0.000308                                      | 0.1192               | 0.0010                                        | 0.6421               |
| c.1124+18C/T<br>(rs2234744)  | 8:89958707                             | -                 | Intron 9  | 39                 | 12               | 0.2716              | 0.3277                                        | 0.0802               | 0.3072                                        | 0.3237               |
| c.1124+91C/A<br>(rs1805818)  | 8:89958634                             | -                 | Intron 9  | 39                 | 12               | 0.2716              | /                                             | /                    | 0.3062                                        | 0.3237               |
| c.1125-79C/A<br>(rs1805786)  | 8:89955634                             | -                 | Intron 9  | 39                 | 9                | 0.2457              | /                                             | /                    | 0.3062                                        | 0.0768               |
| c.1197T/C<br>(rs709816)      | 8:89955483                             | p.Asp399=         | Exon 10   | 44                 | 6                | 0.2414              | 0.3671                                        | <0.0001              | 0.3410                                        | 0.0044               |
| c.1915-7A/G<br>(rs2308962)   | 8:89946302                             | -                 | Intron 12 | 38                 | 11               | 0.2586              | 0.3284                                        | 0.0285               | 0.3062                                        | 0.1775               |
| c.2016A>G<br>(rs1061302)     | 8:89946194                             | p.Pro672=         | Exon 13   | 36                 | 9                | 0.2328              | 0.3280                                        | 0.0026               | 0.3062                                        | 0.0327               |

<sup>1</sup> Data from ExAC: <http://exac.broadinstitute.org/>; <sup>2</sup>Data from 1000genomes: <http://www.1000genomes.org/category/frequently-asked-questions/population>;

<sup>3</sup>chi-square test with Yate's correction
