# Supplementary material for: Detecting Variants in the NBN Gene While Testing for Hereditary Breast Cancer: What to Do Next?
Source: MDPI journal article supplement (doi:10.3390/ijms22115832), 2021-05-29
Supplement: s1 [file s1]

## Supplementary Figure 1

Inferred relationships among haplotypes
