# Supplementary material for: Detecting Variants in the NBN Gene While Testing for Hereditary Breast Cancer: What to Do Next?
Source: MDPI journal article supplement (doi:10.3390/ijms22115832), 2021-05-29
Supplement: s1 [file s1]

| Hap | Allelic content | EAS   | SAS   | EUR   | AFR   | PZ    | TOT   |
|-----|-----------------|-------|-------|-------|-------|-------|-------|
| 1   | TTAGGT          | 32.14 | 43.97 | 65.81 | 13.99 | 54.74 | 38.01 |
| 22  | CCGTAT          | 40.97 | 39.78 | 30.62 | 18.31 | 8.62  | 30.18 |
| 7   | TTGGGT          | 18.06 | 7.46  | 3.48  | 49.77 | 1.72  | 20.94 |
| 9   | TTGTAT          | 5.65  | 4.81  | 0.00  | 2.80  | 3.02  | 3.26  |
| 13  | TCGTGT          | 0.00  | 0.10  | 0.00  | 5.90  | 0.00  | 1.74  |
| 16  | CCAGGT          | 1.39  | 2.45  | 0.00  | 0.53  | 4.31  | 1.21  |
| 19  | CCGGGT          | 1.59  | 0.41  | 0.00  | 3.33  | 0.43  | 1.43  |
| 12  | TCGGGT          | 0.10  | 0.20  | 0.00  | 2.50  | 0.43  | 0.81  |
| 8   | TTGTGT          | 0.00  | 0.00  | 0.00  | 1.06  | 6.03  | 0.62  |
| 21  | CCGTGT          | 0.10  | 0.00  | 0.00  | 1.21  | 1.29  | 0.44  |
| 17  | CCAGAT          | 0.00  | 0.00  | 0.00  | 0.00  | 6.47  | 0.33  |
| 14  | TCGTAT          | 0.00  | 0.51  | 0.00  | 0.45  | 1.29  | 0.31  |
| 3   | TTAGAT          | 0.00  | 0.00  | 0.10  | 0.00  | 4.31  | 0.24  |
| 10  | TCAGGT          | 0.00  | 0.10  | 0.00  | 0.15  | 0.86  | 0.11  |
| 5   | TTATGT          | 0.00  | 0.00  | 0.00  | 0.00  | 1.72  | 0.09  |
| 11  | TCAGAT          | 0.00  | 0.10  | 0.00  | 0.00  | 0.86  | 0.07  |
| 15  | CTGTAT          | 0.00  | 0.10  | 0.00  | 0.00  | 0.86  | 0.07  |
| 6   | TTATAT          | 0.00  | 0.00  | 0.00  | 0.00  | 0.86  | 0.04  |
| 18  | CCATGT          | 0.00  | 0.00  | 0.00  | 0.00  | 0.86  | 0.04  |
| 2   | TTAGGC          | 0.00  | 0.00  | 0.00  | 0.00  | 0.43  | 0.02  |
| 4   | TTAGAC          | 0.00  | 0.00  | 0.00  | 0.00  | 0.43  | 0.02  |
| 20  | CCGGAT          | 0.00  | 0.00  | 0.00  | 0.00  | 0.43  | 0.02  |

| EAS  | SAS | EUR  | AFR  | PZ  | TOT  |
|------|-----|------|------|-----|------|
| 324  | 430 | 662  | 185  | 127 | 1728 |
| 413  | 389 | 308  | 242  | 20  | 1372 |
| 182  | 73  | 35   | 658  | 4   | 952  |
| 57   | 47  | 0    | 37   | 7   | 148  |
| 0    | 1   | 0    | 78   | 0   | 79   |
| 14   | 24  | 0    | 7    | 10  | 55   |
| 16   | 4   | 0    | 44   | 1   | 65   |
| 1    | 2   | 0    | 33   | 1   | 37   |
| 0    | 0   | 0    | 14   | 14  | 28   |
| 1    | 0   | 0    | 16   | 3   | 20   |
| 0    | 0   | 0    | 0    | 15  | 15   |
| 0    | 5   | 0    | 6    | 3   | 14   |
| 0    | 0   | 1    | 0    | 10  | 11   |
| 0    | 1   | 0    | 2    | 2   | 5    |
| 0    | 0   | 0    | 0    | 4   | 4    |
| 0    | 1   | 0    | 0    | 2   | 3    |
| 0    | 1   | 0    | 0    | 2   | 3    |
| 0    | 0   | 0    | 0    | 2   | 2    |
| 0    | 0   | 0    | 0    | 2   | 2    |
| 0    | 0   | 0    | 0    | 1   | 1    |
| 0    | 0   | 0    | 0    | 1   | 1    |
| 0    | 0   | 0    | 0    | 1   | 1    |
| 1008 | 978 | 1006 | 1322 | 232 | 4546 |

| Hap | Allelic content | EAS   | SAS   | EUR   | AFR   | PZ    | TOT   |
|-----|-----------------|-------|-------|-------|-------|-------|-------|
| 1   | TTAGGT          | 32.14 | 43.97 | 65.81 | 13.99 | 54.74 | 38.01 |
| 2   | TTAGGC          | 0.00  | 0.00  | 0.00  | 0.00  | 0.43  | 0.02  |
| 3   | TTAGAT          | 0.00  | 0.00  | 0.10  | 0.00  | 4.31  | 0.24  |
| 4   | TTAGAC          | 0.00  | 0.00  | 0.00  | 0.00  | 0.43  | 0.02  |
| 5   | TTATGT          | 0.00  | 0.00  | 0.00  | 0.00  | 1.72  | 0.09  |
| 6   | TTATAT          | 0.00  | 0.00  | 0.00  | 0.00  | 0.86  | 0.04  |
| 7   | TTGGGT          | 18.06 | 7.46  | 3.48  | 49.77 | 1.72  | 20.94 |
| 8   | TTGTGT          | 0.00  | 0.00  | 0.00  | 1.06  | 6.03  | 0.62  |
| 9   | TTGTAT          | 5.65  | 4.81  | 0.00  | 2.80  | 3.02  | 3.26  |
| 10  | TCAGGT          | 0.00  | 0.10  | 0.00  | 0.15  | 0.86  | 0.11  |
| 11  | TCAGAT          | 0.00  | 0.10  | 0.00  | 0.00  | 0.86  | 0.07  |
| 12  | TCGGGT          | 0.10  | 0.20  | 0.00  | 2.50  | 0.43  | 0.81  |
| 13  | TCGTGT          | 0.00  | 0.10  | 0.00  | 5.90  | 0.00  | 1.74  |
| 14  | TCGTAT          | 0.00  | 0.51  | 0.00  | 0.45  | 1.29  | 0.31  |
| 15  | CTGTAT          | 0.00  | 0.10  | 0.00  | 0.00  | 0.86  | 0.07  |
| 16  | CCAGGT          | 1.39  | 2.45  | 0.00  | 0.53  | 4.31  | 1.21  |
| 17  | CCAGAT          | 0.00  | 0.00  | 0.00  | 0.00  | 6.47  | 0.33  |
| 18  | CCATGT          | 0.00  | 0.00  | 0.00  | 0.00  | 0.86  | 0.04  |
| 19  | CCGGGT          | 1.59  | 0.41  | 0.00  | 3.33  | 0.43  | 1.43  |
| 20  | CCGGAT          | 0.00  | 0.00  | 0.00  | 0.00  | 0.43  | 0.02  |
| 21  | CCGTGT          | 0.10  | 0.00  | 0.00  | 1.21  | 1.29  | 0.44  |
| 22  | CCGTAT          | 40.97 | 39.78 | 30.62 | 18.31 | 8.62  | 30.18 |
