# Supplementary material for: Detecting Variants in the NBN Gene While Testing for Hereditary Breast Cancer: What to Do Next?
Source: MDPI journal article supplement (doi:10.3390/ijms22115832), 2021-05-29
Supplement: s1 [file s1]

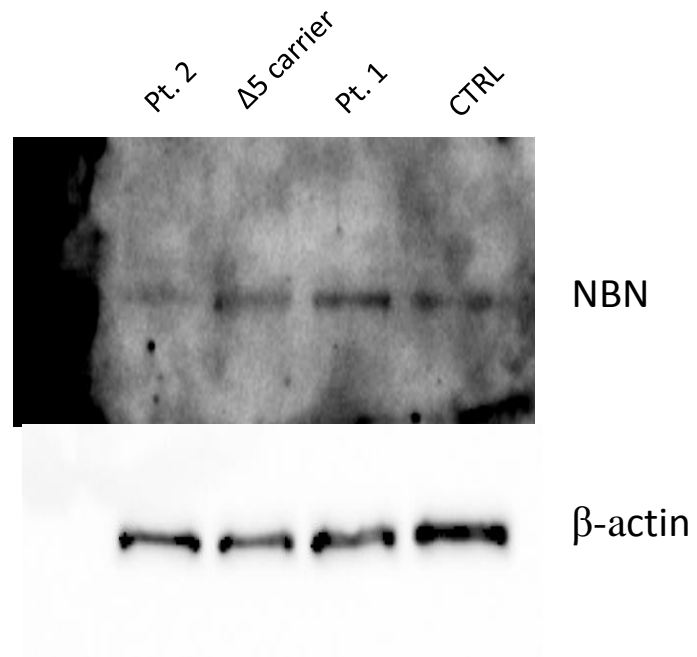

Supplementary Figure 2

Western Blot Analysis on B-LCLs of the patient 1, patient 2, a c.657del5 heterozygote carrier ( $\Delta 5$  carrier) and wild-type individual (CTRL)
