# Supplementary material for: Detecting Variants in the NBN Gene While Testing for Hereditary Breast Cancer: What to Do Next?
Source: Int J Mol Sci. 2021 May 29;22(11):5832. doi: 10.3390/ijms22115832 (PMC8198239; doi:10.3390/ijms22115832)
Supplement: Supplementary file 1 [file ijms-22-05832-s001.zip]

Archive with 7 entries (7 files):
- Supplementary Figure 1.pdf
- Supplementary Table 1.pdf
- Supplementary table 2.pdf
- Supplementary Table 3.pdf
- Supplementary Table 4.pdf
- Supplementray fig2.PNG
- SupplFig2Legend.pdf
